# Supplementary material for: Cytotoxic Illudalane Sesquiterpenes from the Wood-Decay Fungus Granulobasidium vellereum (Ellis & Cragin) Jülich
Source: PubMed Central journal article supplement (PMC6271737; doi:10.3390/molecules190914195), 2014-09-09
Supplement: molecules-19-14195-s001.pdf [file molecules-19-14195-s001.pdf]

# Supplementary Materials

## Contents

|                                                                                                                                         |     |
|-----------------------------------------------------------------------------------------------------------------------------------------|-----|
| Figure S1. $^1\text{H-NMR}$ (methanol- $d_4$ , 600 MHz) spectrum of <b>1</b> .                                                          | S2  |
| Figure S2. $^{13}\text{C-NMR}$ (methanol- $d_4$ , 100 MHz) spectrum of <b>1</b> .                                                       | S2  |
| Figure S3. $^1\text{H-NMR}$ (methanol- $d_4$ , 600 MHz) spectrum of <b>2</b> .                                                          | S3  |
| Figure S4. $^{13}\text{C-NMR}$ (methanol- $d_4$ , 100 MHz) spectrum of <b>2</b> .                                                       | S3  |
| Figure S5. $^1\text{H-NMR}$ (methanol- $d_4$ , 600 MHz) spectrum of <b>3</b> .                                                          | S4  |
| Figure S6. $^{13}\text{C-NMR}$ (methanol- $d_4$ , 100 MHz) spectrum of <b>3</b> .                                                       | S4  |
| Figure S7. $^1\text{H-NMR}$ (methanol- $d_4$ , 600 MHz) spectrum of pterosin M.                                                         | S5  |
| Figure S8. $^{13}\text{C-NMR}$ (methanol- $d_4$ , 100 MHz) spectrum of pterosin M.                                                      | S5  |
| Figure S9. $^1\text{H-NMR}$ (methanol- $d_4$ , 600 MHz) spectrum of echinolactone D.                                                    | S6  |
| Figure S10. $^{13}\text{C-NMR}$ (methanol- $d_4$ , 100 MHz) spectrum of echinolactone D.                                                | S6  |
| Figure S11. $^1\text{H-NMR}$ (methanol- $d_4$ , 600 MHz) spectrum of radulactone.                                                       | S7  |
| Figure S12. $^{13}\text{C-NMR}$ (methanol- $d_4$ , 100 MHz) spectrum of radulactone.                                                    | S7  |
| Figure S13. $^1\text{H-NMR}$ (methanol- $d_4$ , 600 MHz) spectrum of echinolactone A.                                                   | S8  |
| Figure S14. $^{13}\text{C-NMR}$ (methanol- $d_4$ , 100 MHz) spectrum of echinolactone D.                                                | S8  |
| Figure S15. $^1\text{H-NMR}$ (acetone- $d_6$ , 600 MHz) spectrum of <b>1a</b> .                                                         | S9  |
| Figure S16. $^1\text{H-NMR}$ (acetone- $d_6$ , 600 MHz) spectrum of the (S)-MTPA ester of <b>1a</b> .                                   | S9  |
| Figure S17. $^1\text{H-NMR}$ (acetone- $d_6$ , 600 MHz) spectrum of the (R)-MTPA ester of <b>1a</b> .                                   | S10 |
| Figure S18. $^1\text{H-NMR}$ (methanol- $d_6$ , 600 MHz) spectrum of the reaction product of <b>3</b> and cysteine.                     | S10 |
| Figure S19. Structure of <b>1a</b> (R = OH) and the R- and S-MTPA monoesters of <b>1a</b> (R = R-MTPA and R = S-MTPA, respectively).    | S11 |
| Table S1. $^1\text{H-NMR}$ data for compound <b>1a</b> and the R- and S-MTPA monoesters of <b>1a</b> (acetone- $d_6$ , 30 °C, 600 MHz). | S11 |

**Figure S1.**  $^1\text{H}$ -NMR (methanol- $d_4$ , 600 MHz) spectrum of **1**.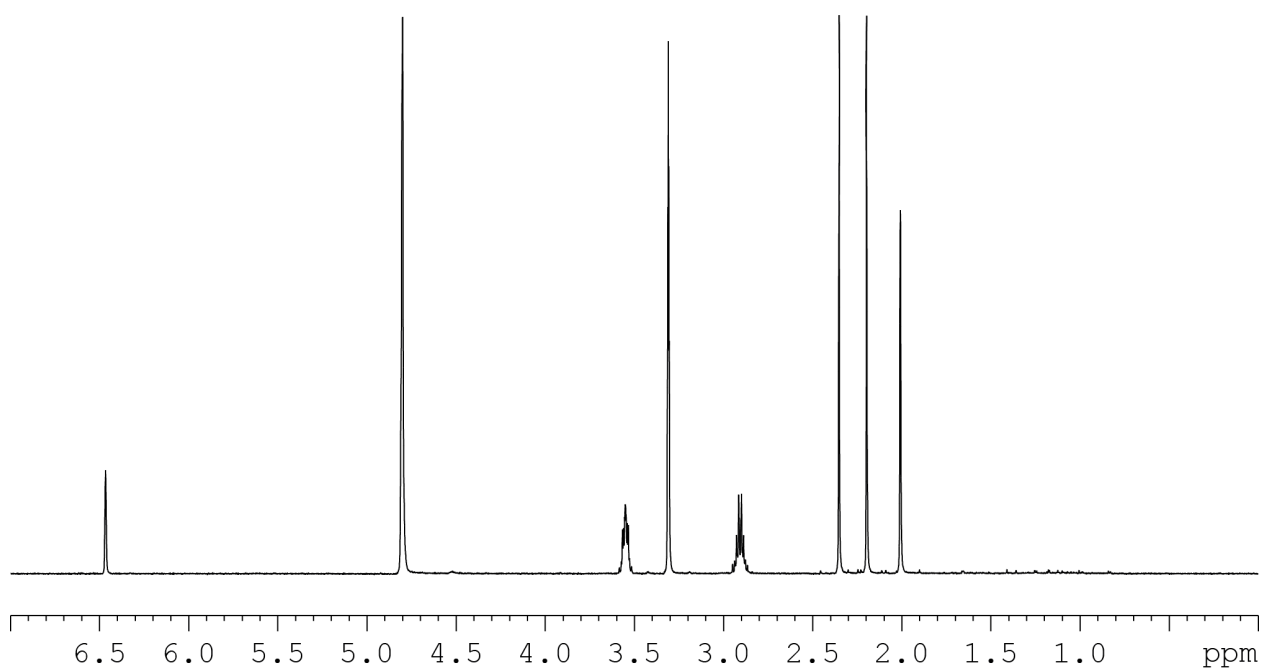**Figure S2.**  $^{13}\text{C}$ -NMR (methanol- $d_4$ , 100 MHz) spectrum of **1**.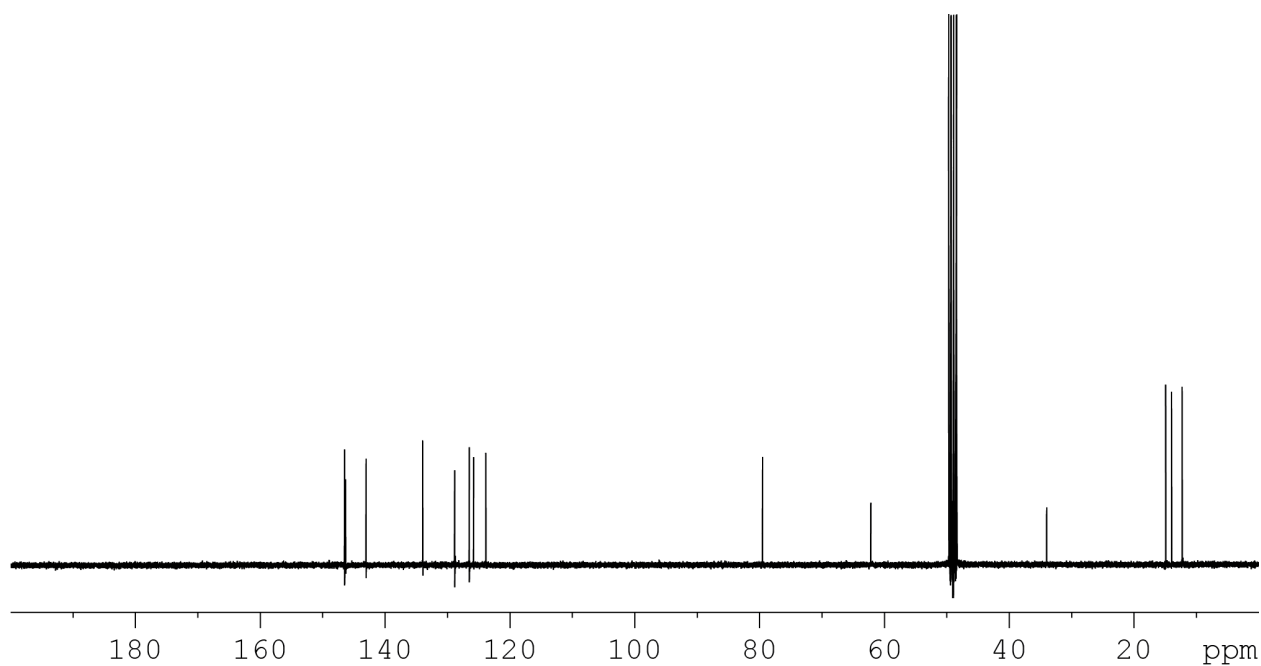

**Figure S3.**  $^1\text{H}$ -NMR (methanol- $d_4$ , 600 MHz) spectrum of **2**.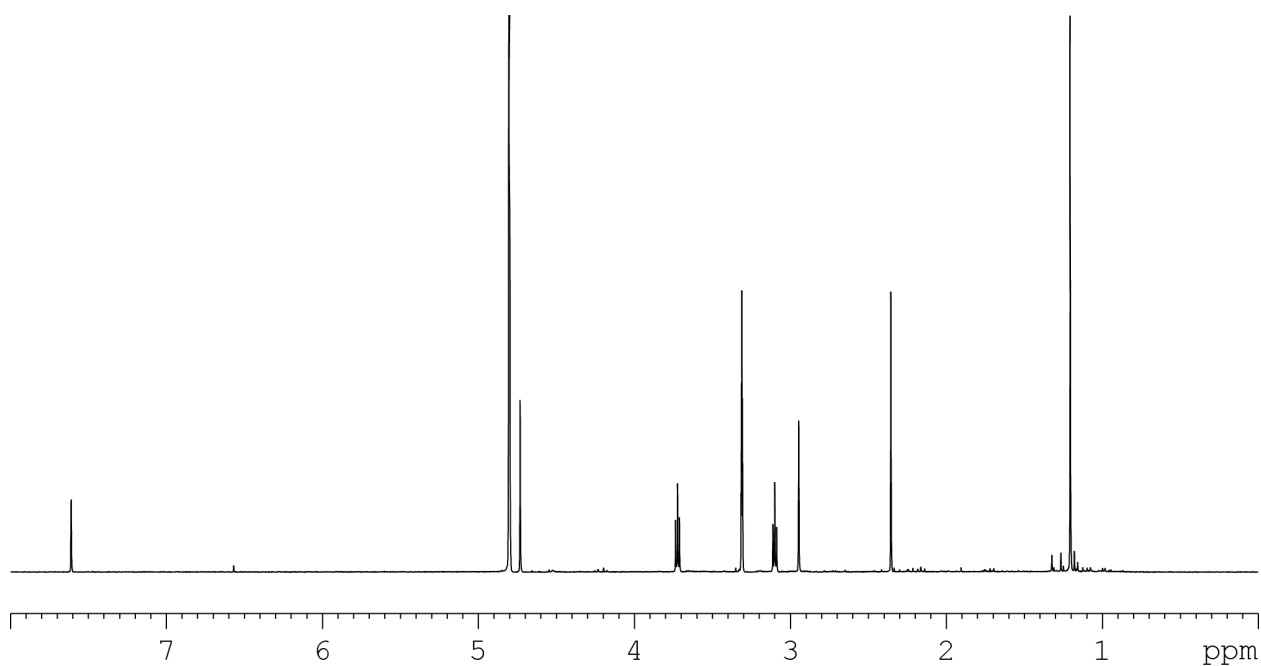**Figure S4.**  $^{13}\text{C}$ -NMR (methanol- $d_4$ , 100 MHz) spectrum of **2**.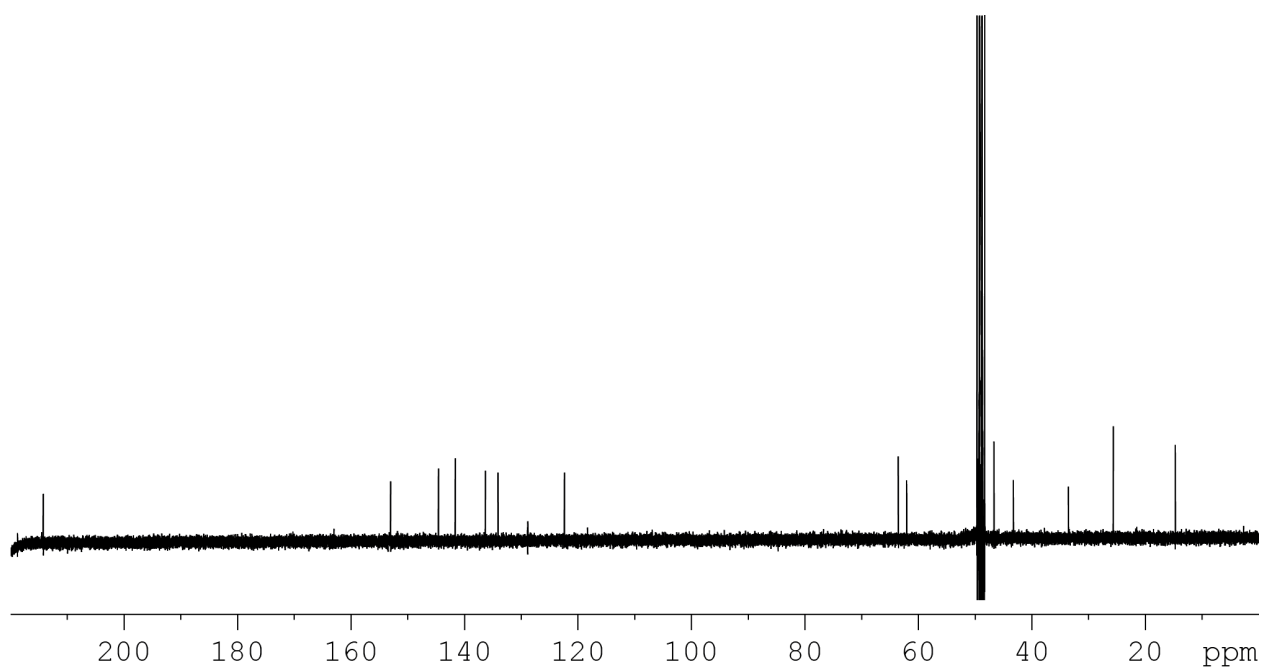

**Figure S5.**  $^1\text{H-NMR}$  (methanol- $d_4$ , 600 MHz) spectrum of **3**.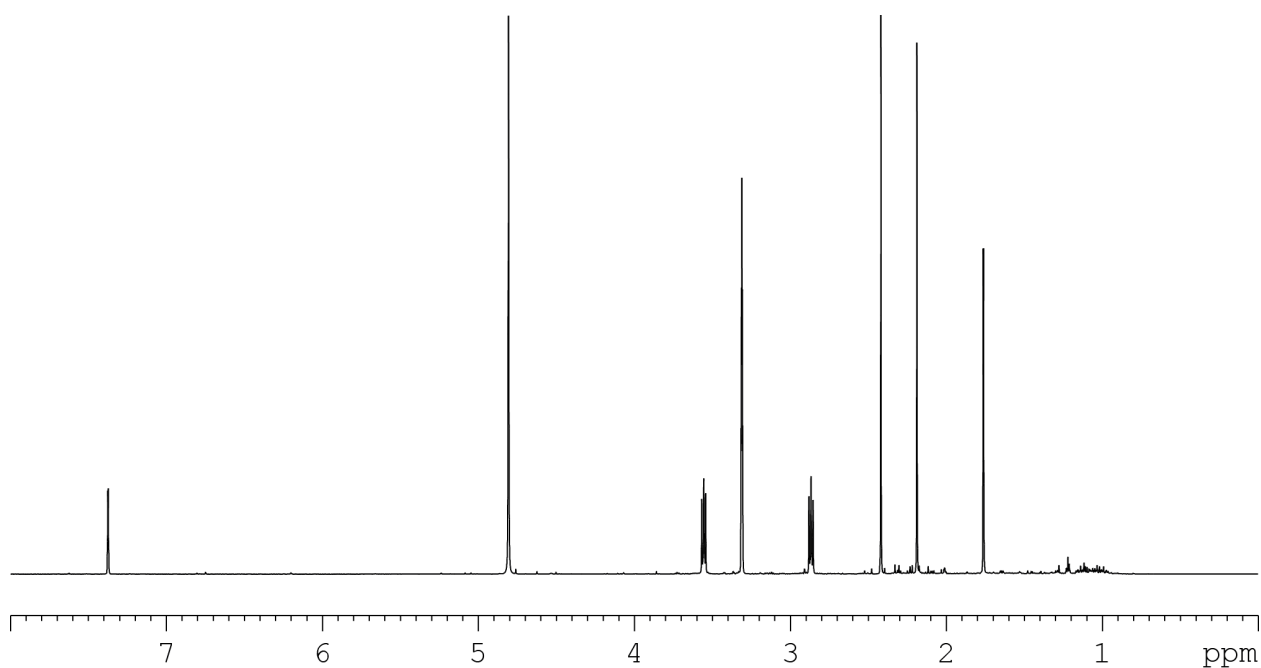**Figure S6.**  $^{13}\text{C-NMR}$  (methanol- $d_4$ , 100 MHz) spectrum of **3**.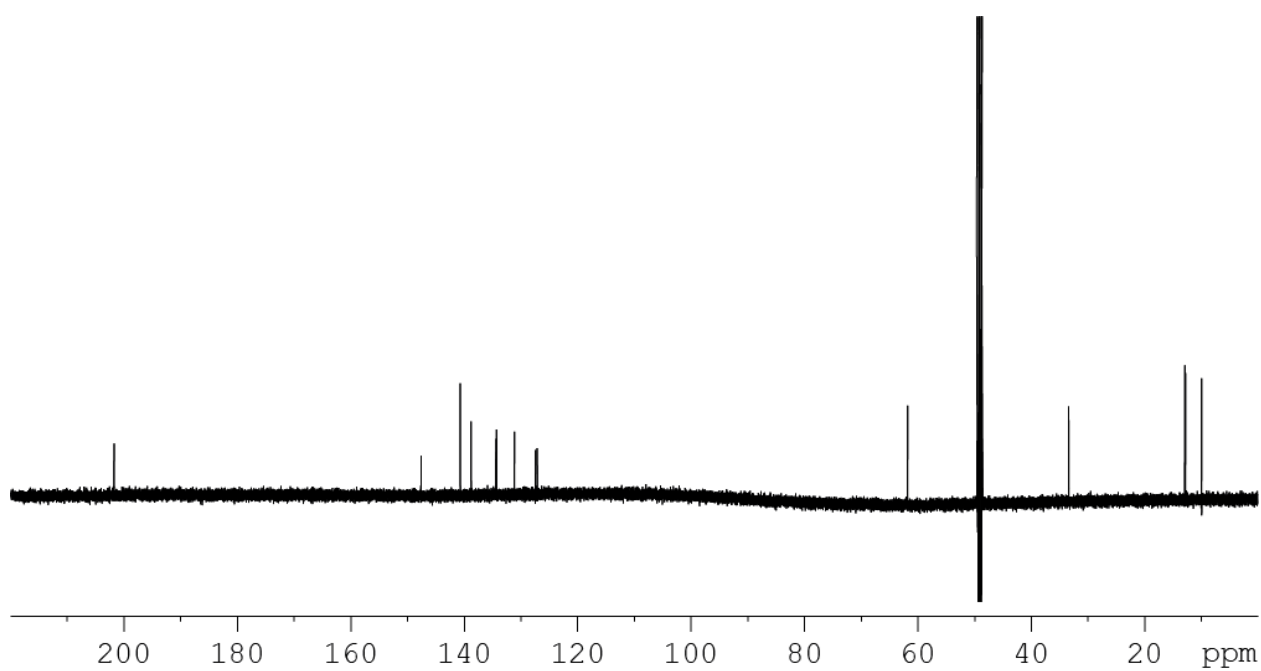

**Figure S7.**  $^1\text{H}$ -NMR (methanol- $d_4$ , 600 MHz) spectrum of pterosin M.

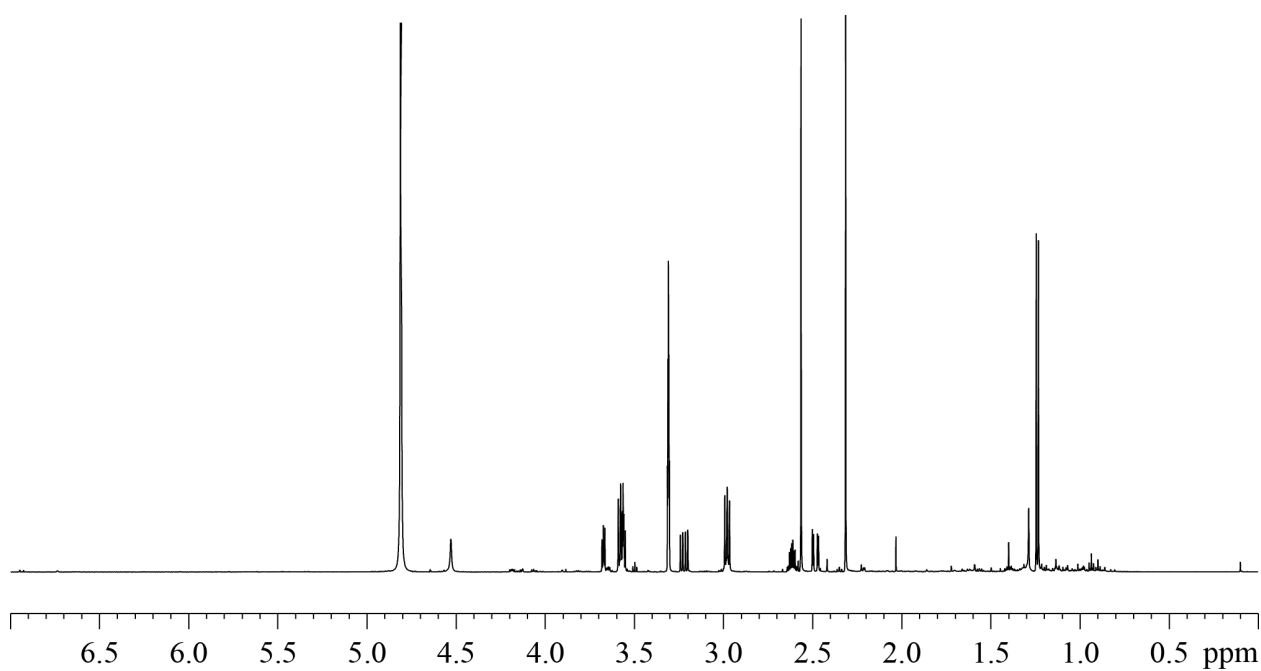

**Figure S8.**  $^{13}\text{C}$ -NMR (methanol- $d_4$ , 100 MHz) spectrum of pterosin M.

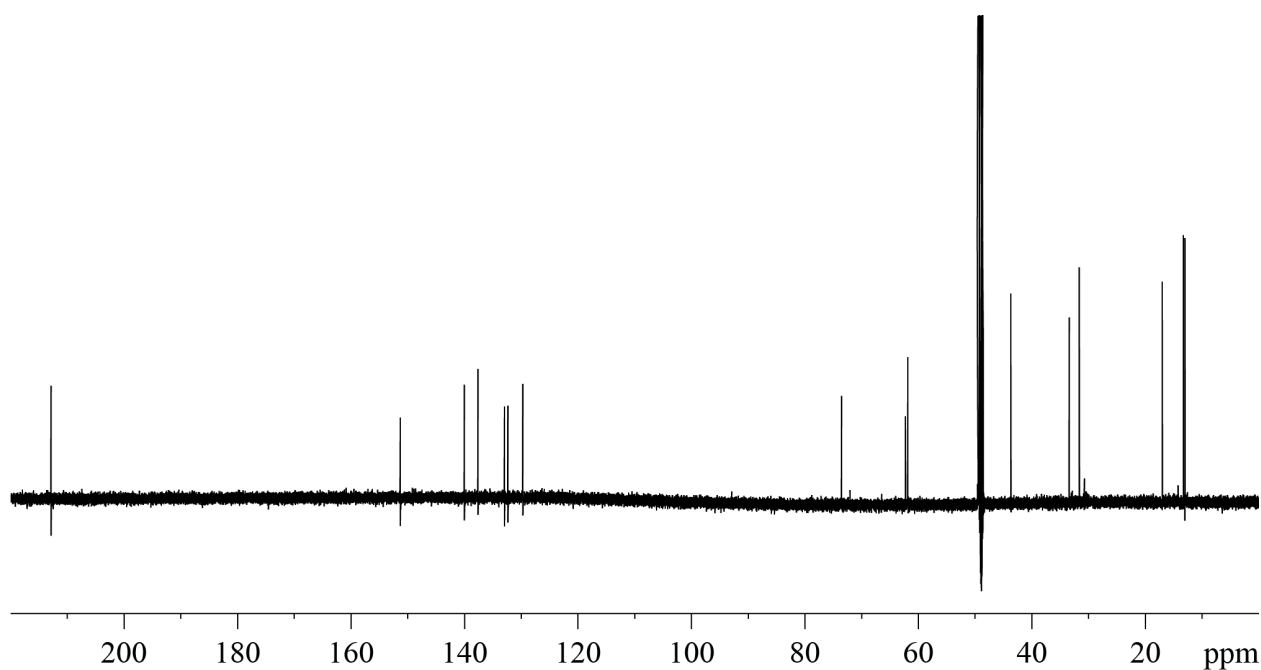

**Figure S9.**  $^1\text{H}$ -NMR (methanol- $d_4$ , 600 MHz) spectrum of echinolactone D.

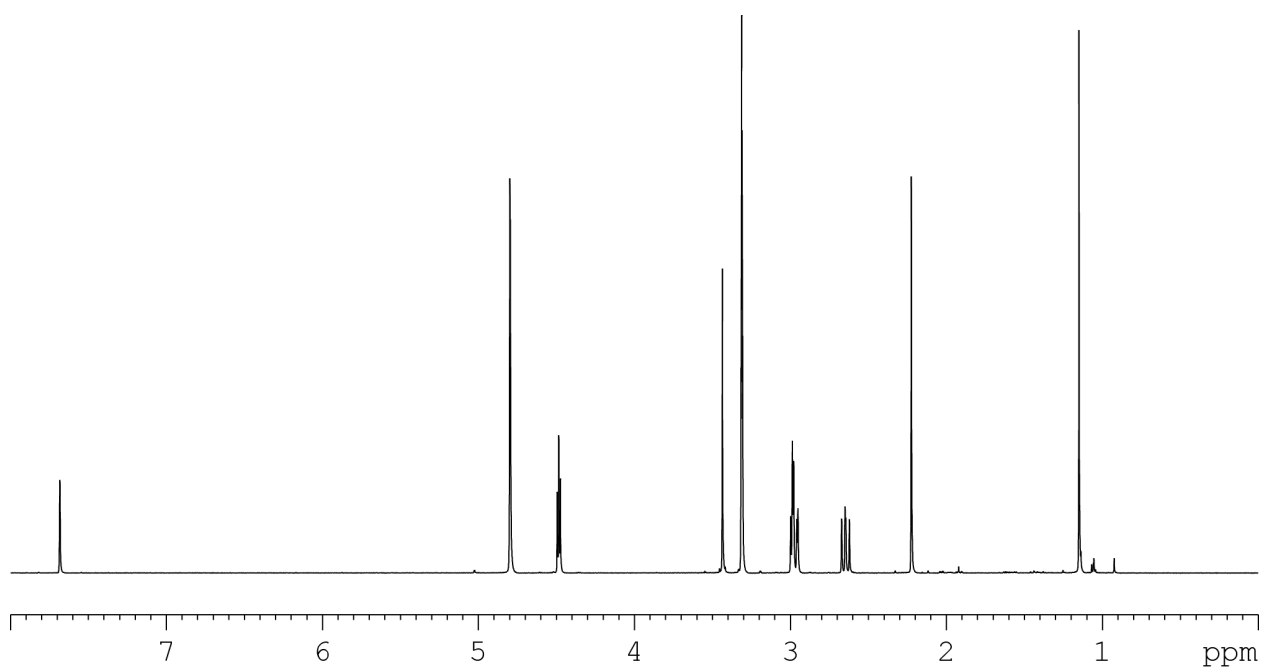

**Figure S10.**  $^{13}\text{C}$ -NMR (methanol- $d_4$ , 100 MHz) spectrum of echinolactone D.

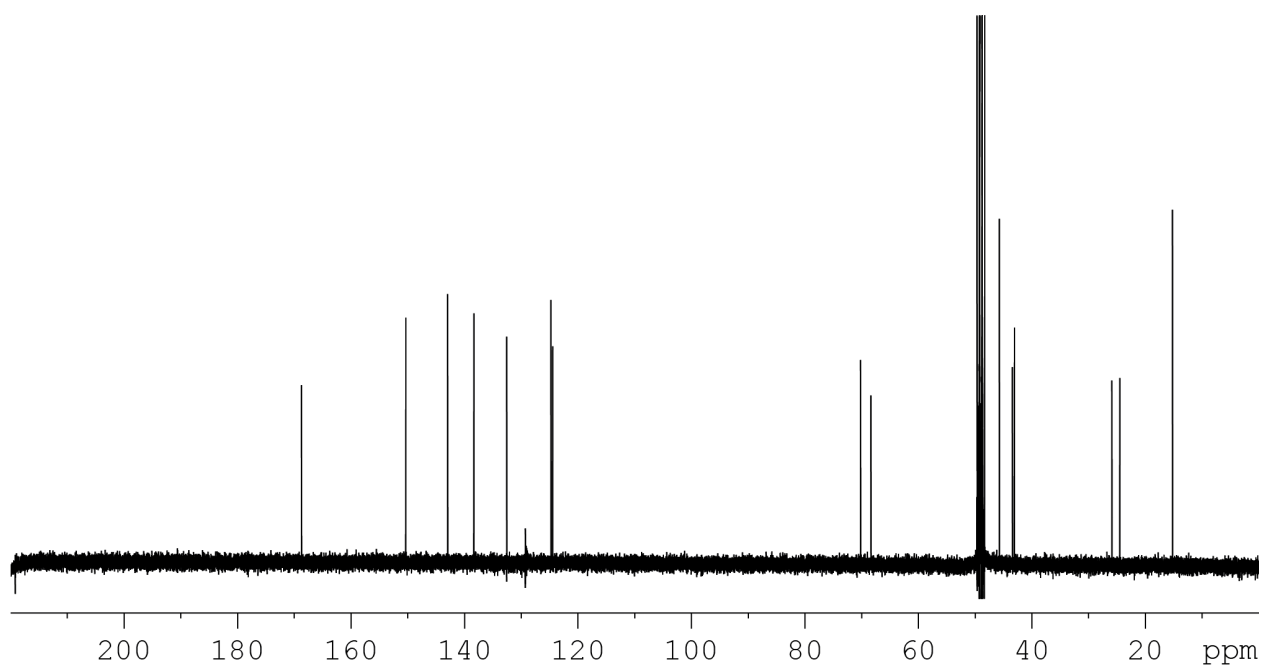

**Figure S11.**  $^1\text{H}$ -NMR (methanol- $d_4$ , 600 MHz) spectrum of radulactone.

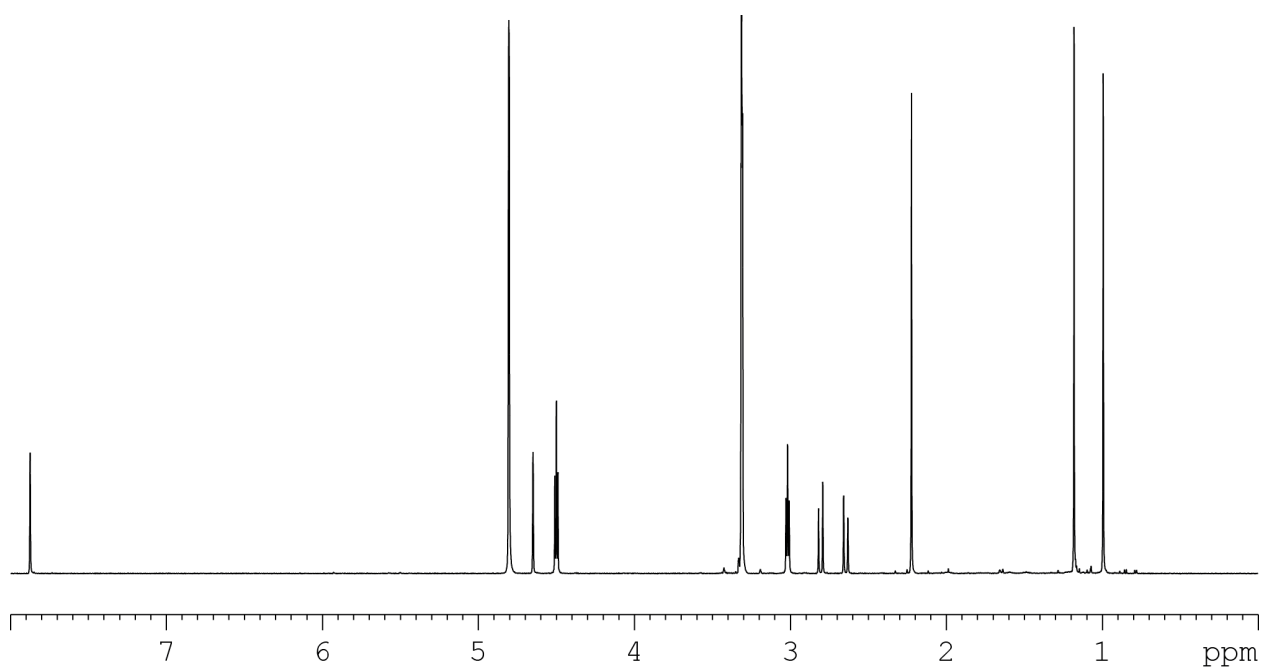

**Figure S12.**  $^{13}\text{C}$ -NMR (methanol- $d_4$ , 100 MHz) spectrum of radulactone.

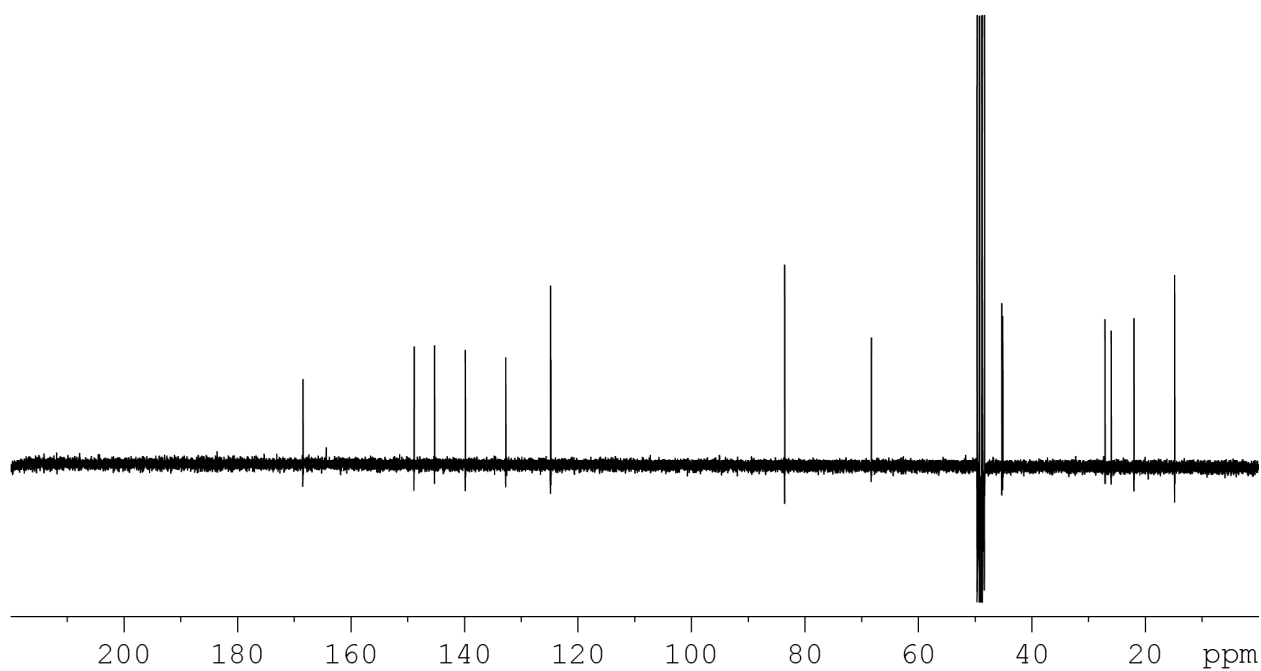

**Figure S13.**  $^1\text{H-NMR}$  (methanol- $d_4$ , 600 MHz) spectrum of echinolactone A.

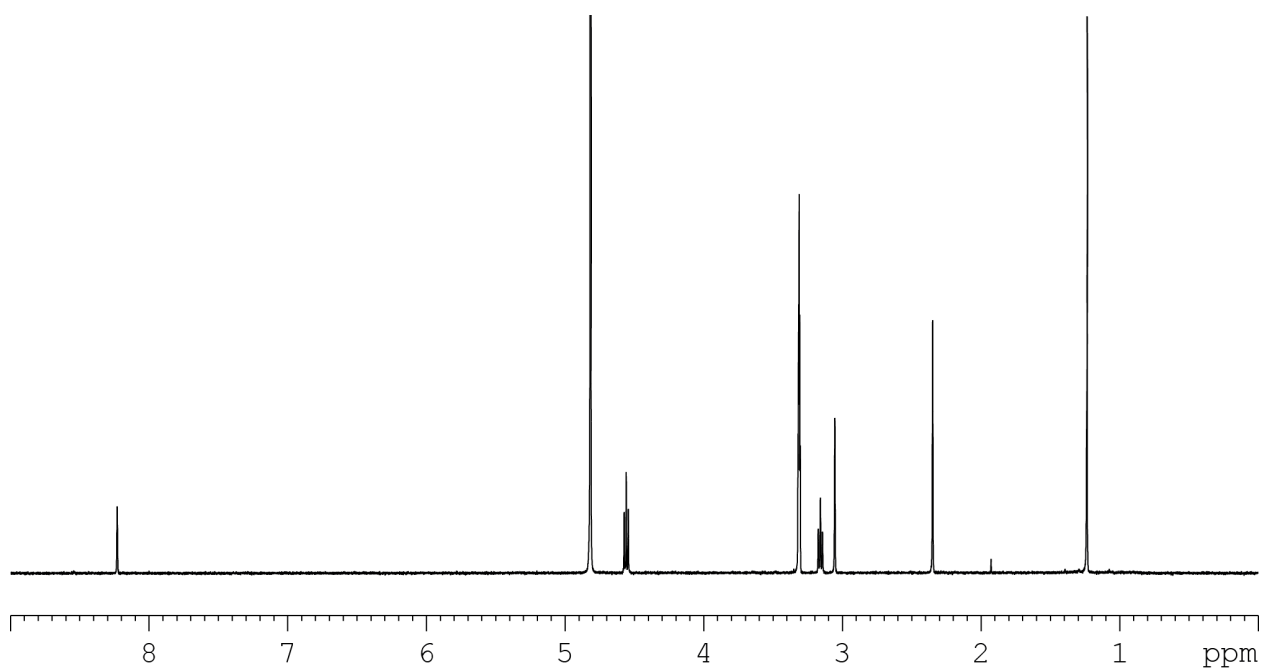

**Figure S14.**  $^{13}\text{C-NMR}$  (methanol- $d_4$ , 100 MHz) spectrum of echinolactone D.

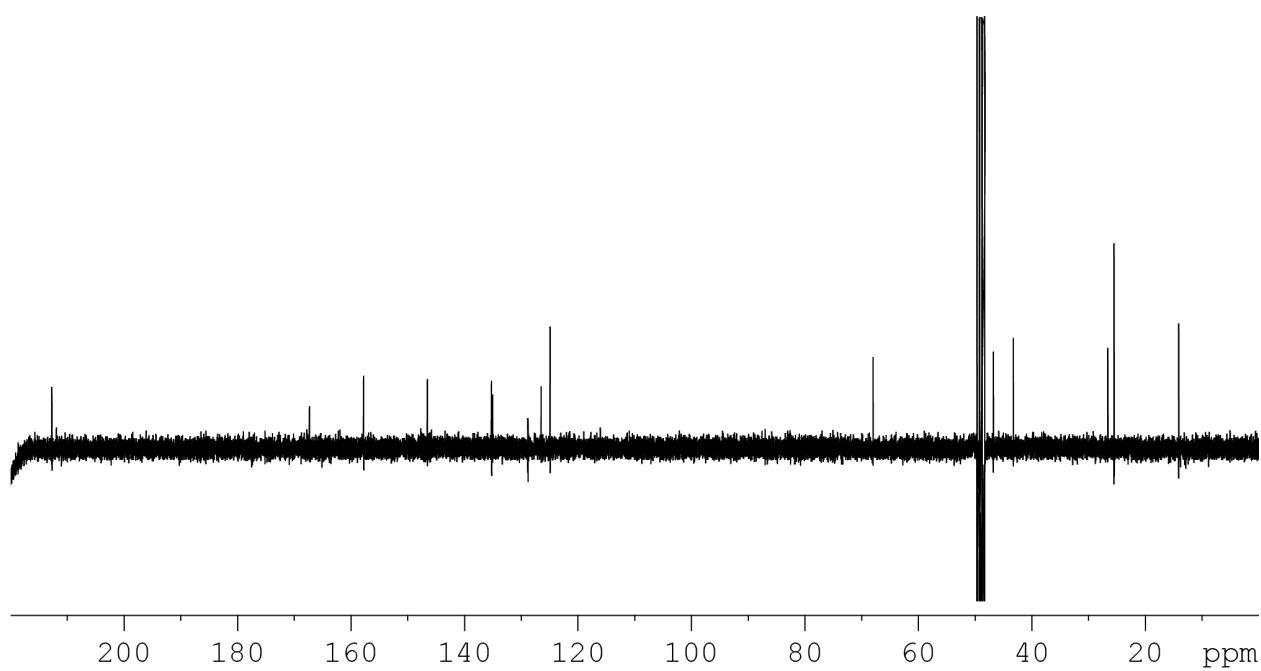



**Figure S15.**  $^1\text{H-NMR}$  (acetone- $d_6$ , 600 MHz) spectrum of **1a**.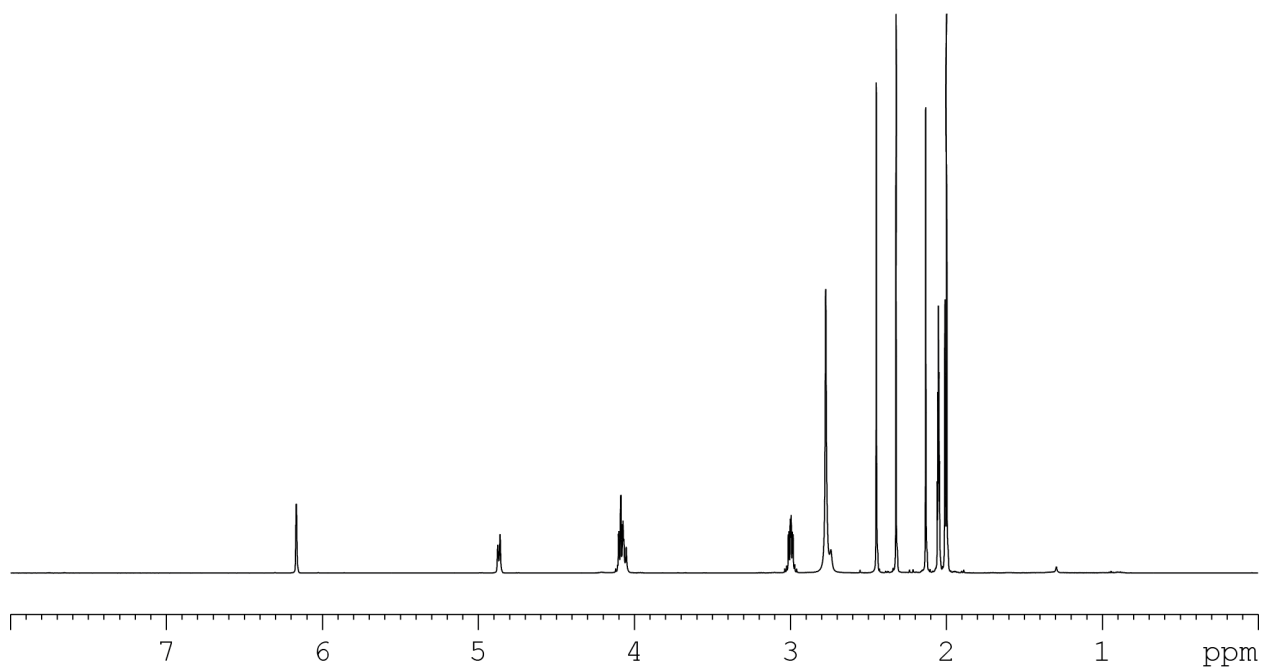**Figure S16.**  $^1\text{H-NMR}$  (acetone- $d_6$ , 600 MHz) spectrum of the (S)-MTPA ester of **1a**.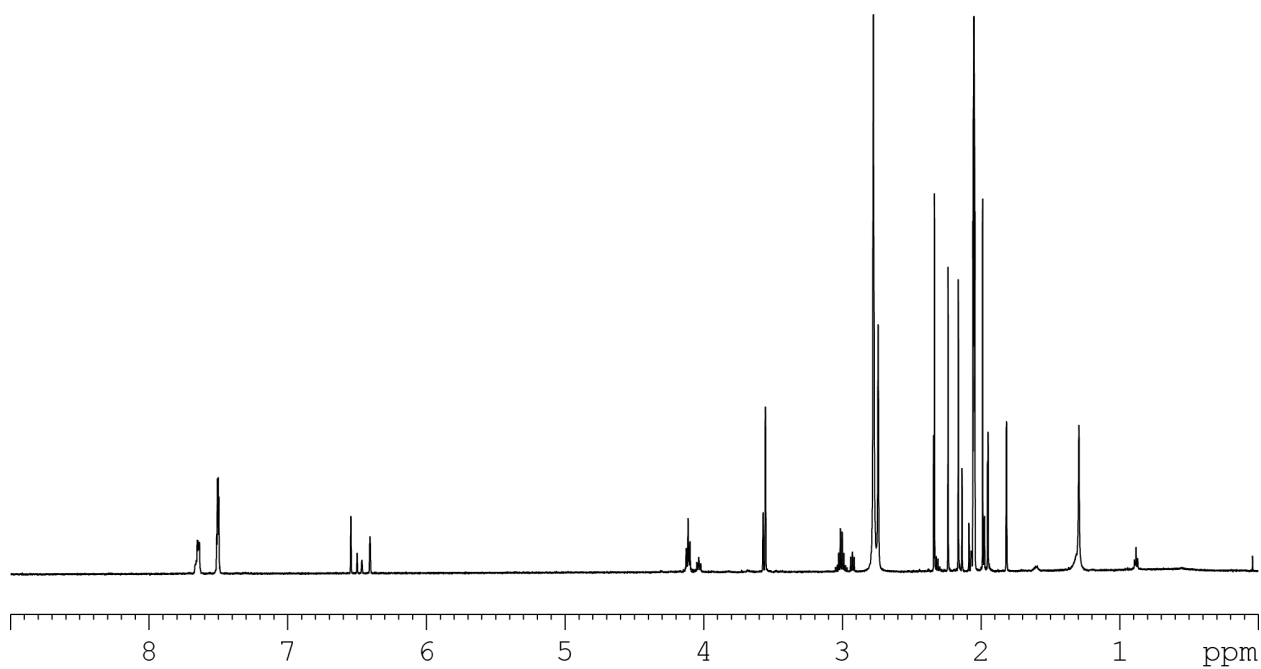

**Figure S17.**  $^1\text{H-NMR}$  (acetone- $d_6$ , 600 MHz) spectrum of the (R)-MTPA ester of **1a**.

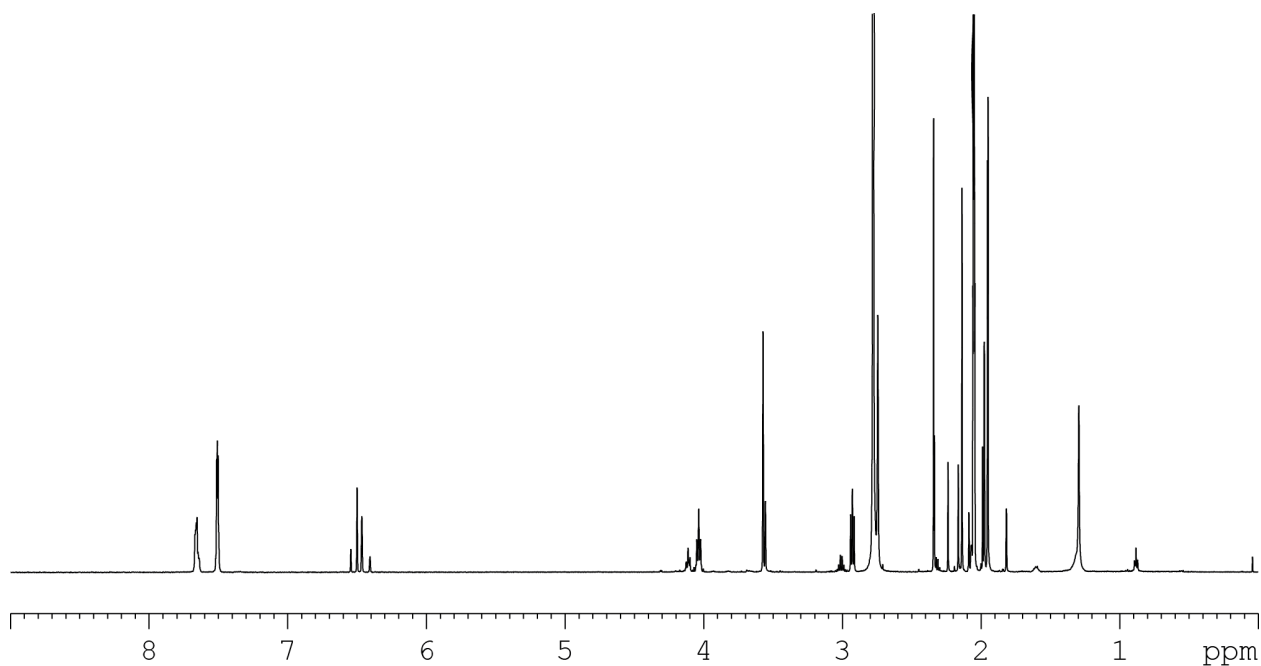

**Figure S18.**  $^1\text{H-NMR}$  (methanol- $d_6$ , 600 MHz) spectrum of the reaction product of **3** and cysteine.

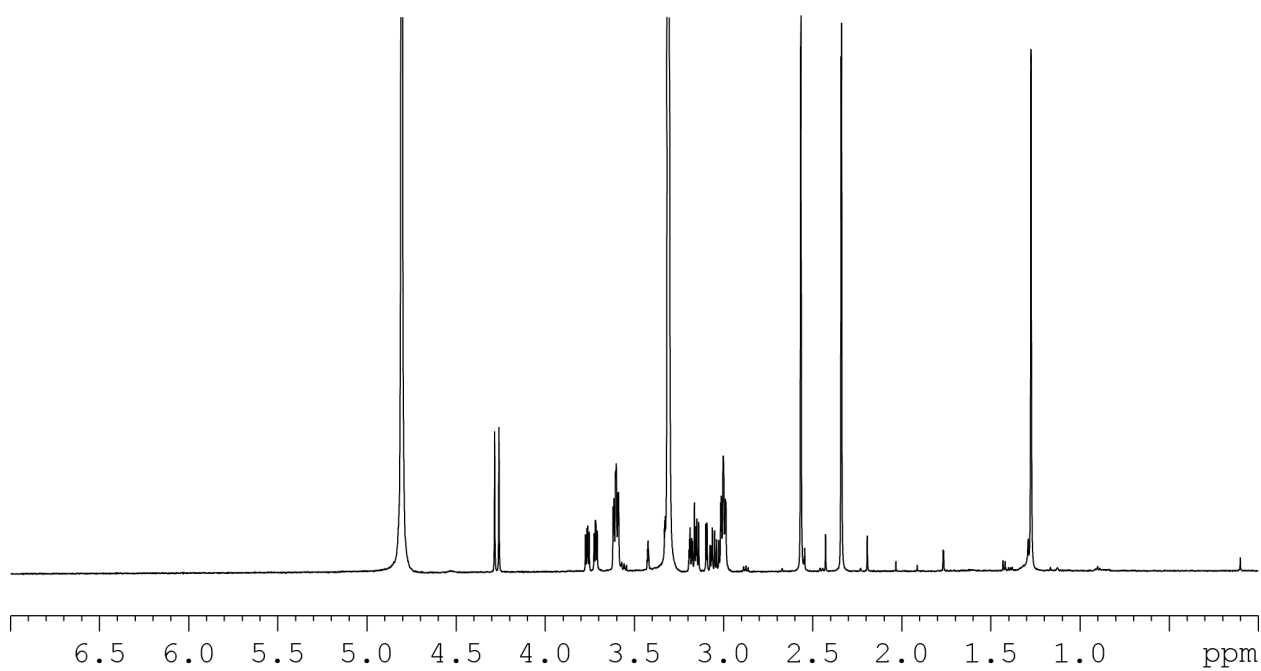

**Figure S19.** Structure of **1a** (R = OH) and the R- and S-MTPA monoesters of **1a** (R = R-MTPA and R = S-MTPA, respectively).

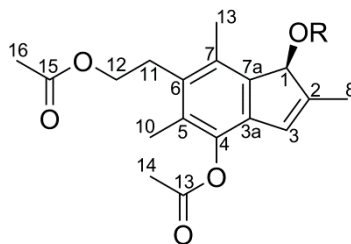

**Table S1.**  $^1\text{H-NMR}$  data for compound **1a** and the R- and S-MTPA monoesters of **1a** (acetone- $d_6$ , 30 °C, 600 MHz).

| pos.      | <b>1a</b>                     | <b>R-MTPA Ester of 1a</b>     | <b>S-MTPA Ester of 1a</b>     |
|-----------|-------------------------------|-------------------------------|-------------------------------|
|           | $\delta_{\text{H}}$ (J in Hz) | $\delta_{\text{H}}$ (J in Hz) | $\delta_{\text{H}}$ (J in Hz) |
| <b>1</b>  | 4.87, m                       | 6.47, s                       | 6.54, s                       |
| <b>2</b>  |                               |                               |                               |
| <b>3</b>  | 6.17, bs                      | 6.5, s                        | 6.41, s                       |
| <b>4</b>  |                               |                               |                               |
| <b>4a</b> |                               |                               |                               |
| <b>5</b>  |                               |                               |                               |
| <b>6</b>  |                               |                               |                               |
| <b>7</b>  |                               |                               |                               |
| <b>7a</b> |                               |                               |                               |
| <b>8</b>  | 2.01, bs                      | 1.98, bs                      | 1.82, s                       |
| <b>9</b>  |                               |                               |                               |
| <b>10</b> | 2.13, s                       | 2.14, s                       | 2.16, s                       |
| <b>11</b> | 3.00, m                       | 2.93, m                       | 3.01, m                       |
| <b>12</b> | 4.09, m                       | 4.00, m                       | 4.11, m                       |
| <b>13</b> | 2.45, s                       | 1.95, s                       | 2.23, s                       |
| <b>14</b> | 2.32, s                       | 2.34, s                       | 2.34, s                       |
| <b>15</b> |                               |                               |                               |
| <b>16</b> | 2.00, s                       | 1.95, s                       | 1.99, s                       |
